# Supplementary material for: The “silent CO”: a new technique for calculating transition metal carbonyl force fields
Source: Royal Society of Chemistry journal article supplement (doi:10.1039/d1dt03186d), 2021-12-22
Supplement: d1dt03186d1.pdf [file d1dt03186d1.pdf]

## The “Silent CO”: a new technique for calculating transition metal carbonyl force fields

### Electronic Supplementary Information

John A. Timney<sup>a,\*</sup> and James J. Turner<sup>b,\*</sup>

<sup>a</sup> 26 Neasdon Crescent, North Shields NE30 2TP, UK

<sup>b</sup> School of Chemistry, University of Nottingham, University Park, Nottingham, NG7 2RD, UK

\* Email addresses: john.timney@icloud.com, james.turner@nottingham.ac.uk

The supplementary information is divided into five sections:

- 1 Ni(CO)<sub>4</sub> – the model system
- 2 Tricarbonyls
  - 2.1 C<sub>5</sub> Fe(CO)<sub>3</sub>(diene) Complexes
  - 2.2 *fac*-Re(CO)<sub>3</sub>(N-N)(ligand) Complexes
  - 2.3 *mer*-M(CO)<sub>3</sub>(L)<sub>3</sub> Complexes (M = Cr, Mo, W)
- 3 Tetracarbonyls
  - 3.1 *cis*-M(CO)<sub>4</sub>(L)<sub>2</sub> Complexes
    - 3.1.1 The *b*<sub>2</sub> method
    - 3.1.2 The *b*<sub>1</sub> method
  - 3.2 C<sub>3v</sub> and C<sub>2v</sub> Fe(CO)<sub>4</sub>(L) Complexes
    - 3.2.1 C<sub>3v</sub> Symmetry where L is axial
    - 3.2.2 C<sub>2v</sub> Symmetry where L is equatorial
- 4 Pentacarbonyls
  - 4.1 C<sub>4v</sub> M(CO)<sub>5</sub>(L) (M = Cr, Mo, W) and Mn(CO)<sub>5</sub>(X) Complexes
    - 4.1.1 M(CO)<sub>5</sub>(L) Complexes (M = Cr, Mo, W)
    - 4.1.2 Mn(CO)<sub>5</sub>(X) Complexes
- 5 Force Constant Calculations for Fe(CO)<sub>4</sub>(N<sub>2</sub>)

## 1 Ni(CO)<sub>4</sub> – the model system

Ni(CO)<sub>3</sub>(L) data used to calculate  $\nu(a_1)$  for Ni(CO)<sub>4</sub>.

| <b>Table S1: Ni(CO)<sub>3</sub>L molecules used to calculate an EFFF for Ni(CO)<sub>4</sub></b> |            |          |          |        |                                                                                          |
|-------------------------------------------------------------------------------------------------|------------|----------|----------|--------|------------------------------------------------------------------------------------------|
| Molecule                                                                                        | $\nu(a_1)$ | $\nu(e)$ | $K(a_1)$ | $K(e)$ | Ref.                                                                                     |
| Ni(CO) <sub>3</sub> (PF <sub>3</sub> )                                                          | 2111       | 2049     | 1800     | 1696   | P. S. Braterman,<br>"Metal Carbonyl Spectra"<br>Table 7.14 (p212) and references therein |
| Ni(CO) <sub>3</sub> (PCl <sub>3</sub> )                                                         | 2103       | 2044     | 1786     | 1688   |                                                                                          |
| Ni(CO) <sub>3</sub> (POMe <sub>3</sub> )                                                        | 2082       | 2010     | 1751     | 1632   |                                                                                          |
| Ni(CO) <sub>3</sub> (POBu <sub>3</sub> )                                                        | 2077       | 2004     | 1743     | 1622   |                                                                                          |
| Ni(CO) <sub>3</sub> (P(p-C <sub>6</sub> H <sub>4</sub> OCH <sub>3</sub> ) <sub>3</sub> )        | 2066       | 1987     | 1724     | 1595   |                                                                                          |
| Ni(CO) <sub>3</sub> (PMe <sub>3</sub> )                                                         | 2069       | 1994     | 1729     | 1606   |                                                                                          |
| Ni(CO) <sub>3</sub> (SbEt <sub>3</sub> )                                                        | 2067       | 1996     | 1726     | 1609   |                                                                                          |
| Ni(CO) <sub>3</sub> (SbPh <sub>3</sub> )                                                        | 2074       | 2005     | 1737     | 1624   |                                                                                          |
| Ni(CO) <sub>3</sub> (BiEt <sub>3</sub> )                                                        | 2072       | 1996     | 1734     | 1609   |                                                                                          |

$$K(a_1) = 0.7477 \times K(e) + 528.17$$

(9 data points, R<sup>2</sup> = 0.9811)

## 2 Tricarbonyls

### 2.1 C<sub>s</sub> Fe(CO)<sub>3</sub>(diene) complexes

As is explained in the main text, Fe(CO)<sub>2</sub>(diene)(L) complexes are used to calculate EFFFs for Fe(CO)<sub>3</sub>(diene) species

| <b>Table S2: Fe(CO)<sub>2</sub>(diene)(L) (and diene-like) molecules used to calculate EFFFs for Fe(CO)<sub>3</sub>(diene)</b> |           |            |         |          |                                                                                   |
|--------------------------------------------------------------------------------------------------------------------------------|-----------|------------|---------|----------|-----------------------------------------------------------------------------------|
| Molecule                                                                                                                       | $\nu(a')$ | $\nu(a'')$ | $K(a')$ | $K(a'')$ | Ref.                                                                              |
| Fe(CO) <sub>2</sub> (C <sub>7</sub> H <sub>5</sub> )(PEt <sub>3</sub> )                                                        | 1978      | 1920       | 1581    | 1490     | A. Reckziegel and M. Bigorgne,<br><i>J. Organometal. Chem.</i> , 3 (1965) 341-354 |
| Fe(CO) <sub>2</sub> (C <sub>7</sub> H <sub>8</sub> )(PEt <sub>3</sub> )                                                        | 1969      | 1913       | 1566    | 1478     |                                                                                   |
| Fe(CO) <sub>2</sub> (butadiene)(PEt <sub>3</sub> )                                                                             | 1980      | 1921       | 1584    | 1490     |                                                                                   |
| Fe(CO) <sub>2</sub> (C <sub>7</sub> H <sub>8</sub> )(PPh <sub>3</sub> )                                                        | 1974      | 1921       | 1574    | 1490     |                                                                                   |
| Fe(CO) <sub>2</sub> (C <sub>7</sub> H <sub>5</sub> )(P(OMe) <sub>3</sub> )                                                     | 1993      | 1936       | 1604    | 1514     |                                                                                   |
| Fe(CO) <sub>2</sub> (C <sub>7</sub> H <sub>8</sub> )(P(OMe) <sub>3</sub> )                                                     | 1982      | 1928       | 1587    | 1501     |                                                                                   |
| Fe(CO) <sub>2</sub> (butadiene)(P(OMe) <sub>3</sub> )                                                                          | 1989      | 1934       | 1598    | 1511     |                                                                                   |

|                                                                          |      |      |      |      |                                                                                                              |                                                                                    |
|--------------------------------------------------------------------------|------|------|------|------|--------------------------------------------------------------------------------------------------------------|------------------------------------------------------------------------------------|
| Fe(CO) <sub>2</sub> (E-pentadiene)(P(OMe) <sub>3</sub> )                 | 1989 | 1931 | 1598 | 1506 | Gustorf & R. Rumlin<br><i>J. Organometal. Chem.</i> , 187 (1980) 361                                         |                                                                                    |
| Fe(CO) <sub>2</sub> (methylsorbate)(P(OMe) <sub>3</sub> )                | 2003 | 1946 | 1621 | 1530 |                                                                                                              |                                                                                    |
| Fe(CO) <sub>2</sub> (cyclobutadiene)(P(OMe) <sub>3</sub> )               | 1988 | 1932 | 1596 | 1508 |                                                                                                              |                                                                                    |
| Fe(CO) <sub>2</sub> (PhCHCHCOH)(PPh <sub>3</sub> )                       | 2000 | 1947 | 1616 | 1531 | G. Cardaci and G. Concetti,<br><i>J. Organometal. Chem.</i> , 90 (1974) 49-52                                |                                                                                    |
| Fe(CO) <sub>2</sub> (PhCHCHCOH)(AsPh <sub>3</sub> )                      | 2000 | 1951 | 1616 | 1538 |                                                                                                              |                                                                                    |
| Fe(CO) <sub>2</sub> (PhCHCHCOCH <sub>3</sub> )(PPh <sub>3</sub> )        | 2002 | 1947 | 1619 | 1531 |                                                                                                              |                                                                                    |
| Fe(CO) <sub>2</sub> (PhCHCHCOCH <sub>3</sub> )(SbPh <sub>3</sub> )       | 1997 | 1945 | 1611 | 1528 |                                                                                                              |                                                                                    |
| Fe(CO) <sub>2</sub> (PhCHCHCOPh)(PPh <sub>3</sub> )                      | 2000 | 1947 | 1616 | 1531 |                                                                                                              |                                                                                    |
| Fe(CO) <sub>2</sub> (PhCHCHCOPh)(AsPh <sub>3</sub> )                     | 2002 | 1947 | 1619 | 1531 |                                                                                                              |                                                                                    |
| Fe(CO) <sub>2</sub> (PhCHCHCOPh)(SbPh <sub>3</sub> )                     | 2000 | 1947 | 1616 | 1531 |                                                                                                              |                                                                                    |
| Fe(CO) <sub>2</sub> (butadiene)(PPh <sub>3</sub> )                       | 1973 | 1910 | 1572 | 1474 |                                                                                                              | F. M. Chaudhari and P. L. Pauson,<br><i>J. Organometal. Chem.</i> , 5 (1966) 73-78 |
| Fe(CO) <sub>2</sub> (cyclohexadiene)(PPh <sub>3</sub> )                  | 1960 | 1894 | 1552 | 1449 |                                                                                                              |                                                                                    |
| Fe(CO) <sub>2</sub> (cycloheptaadiene)(PPh <sub>3</sub> )                | 1965 | 1905 | 1560 | 1466 |                                                                                                              |                                                                                    |
| Fe(CO) <sub>2</sub> (cycloheptatriene)(PPh <sub>3</sub> )                | 1973 | 1920 | 1572 | 1489 |                                                                                                              |                                                                                    |
| Fe(CO) <sub>2</sub> (C <sub>4</sub> Ph <sub>4</sub> )(PPh <sub>3</sub> ) | 1955 | 1904 | 1544 | 1464 |                                                                                                              |                                                                                    |
| Fe(CO) <sub>2</sub> (bda)(PPh <sub>3</sub> )                             | 1999 | 1939 | 1614 | 1519 | B. F. G. Johnson, J. Lewis, G. R. Stephenson and<br>E. J. S. Vichi<br><i>J. C. S. Dalton</i> , 1978, 369-373 |                                                                                    |
| Fe(CO) <sub>2</sub> (bda)(P(OPh) <sub>3</sub> )                          | 2015 | 1958 | 1640 | 1549 |                                                                                                              |                                                                                    |
| Fe(CO) <sub>2</sub> (cyclohexadiene)(PPh <sub>3</sub> )                  | 1981 | 1927 | 1585 | 1500 |                                                                                                              |                                                                                    |
| Fe(CO) <sub>2</sub> (cyclohexadiene)(P(OPh) <sub>3</sub> )               | 2067 | 2021 | 1726 | 1650 |                                                                                                              |                                                                                    |
| Fe(CO) <sub>2</sub> (chd)(PPh <sub>3</sub> )                             | 1979 | 1925 | 1582 | 1497 |                                                                                                              |                                                                                    |
| Fe(CO) <sub>2</sub> (chd)(P(OPh) <sub>3</sub> )                          | 2065 | 2019 | 1722 | 1647 |                                                                                                              |                                                                                    |
| Fe(CO) <sub>2</sub> (MeO-chd)(PPh <sub>3</sub> )                         | 1978 | 1924 | 1580 | 1495 |                                                                                                              |                                                                                    |
| Fe(CO) <sub>2</sub> (MeO-chd)(P(OPh) <sub>3</sub> )                      | 2065 | 2018 | 1722 | 1645 |                                                                                                              |                                                                                    |
| Fe(CO) <sub>2</sub> (acetylgosterol)(PPh <sub>3</sub> )                  | 1974 | 1920 | 1574 | 1489 |                                                                                                              |                                                                                    |

$$K(a') = 0.9191 \times K(a'') + 209.9$$

(31 data points, R<sup>2</sup> = 0.9884)

## 2.2 *fac*-Re(CO)<sub>3</sub>(N-N)(ligand) complexes

As with the iron-diene dicarbonyls above, *fac*-Re(CO)<sub>2</sub>(N-N)(X)(L) and [*fac*-Re(CO)<sub>2</sub>(N-N)(L)(L')]<sup>+</sup> are used to calculate EFFFs for *fac*-Re(CO)<sub>3</sub>(N-N)(X) and [*fac*-Re(CO)<sub>3</sub>(N-N)(L)]<sup>+</sup>, given as Table S3.

| Table S3: <i>cis,trans</i> -Re(CO) <sub>2</sub> (N-N)(L)(X) and [ <i>cis,trans</i> -Re(CO) <sub>2</sub> (N-N)(L)(L')] <sup>+</sup> molecules used to calculate EFFFs for <i>fac</i> -Re(CO) <sub>3</sub> (N-N)(X) and [ <i>fac</i> -Re(CO) <sub>3</sub> (N-N)(L)] <sup>+</sup> |           |            |         |          |                                                                                                                       |
|--------------------------------------------------------------------------------------------------------------------------------------------------------------------------------------------------------------------------------------------------------------------------------|-----------|------------|---------|----------|-----------------------------------------------------------------------------------------------------------------------|
| Molecule                                                                                                                                                                                                                                                                       | $\nu(a')$ | $\nu(a'')$ | $K(a')$ | $K(a'')$ | Ref.                                                                                                                  |
| [Re(CO) <sub>2</sub> (bpy)(c-dppene)] <sup>+</sup>                                                                                                                                                                                                                             | 1959      | 1888       | 1440    | 1550     | J. L. Smithback, J. B. Helms, E. Schutte, S. M. Woessner, B. P. Sullivan<br><i>Inorg. Chem.</i> , 45 (2006) 2163-2174 |
| [Re(CO) <sub>2</sub> (bpy)(diphos)] <sup>+</sup>                                                                                                                                                                                                                               | 1952      | 1881       | 1429    | 1539     |                                                                                                                       |
| [Re(CO) <sub>2</sub> (bpy)(dppm)] <sup>+</sup>                                                                                                                                                                                                                                 | 1950      | 1884       | 1434    | 1536     |                                                                                                                       |
| Re(CO) <sub>2</sub> (bpy)(MeCN)(Cl)                                                                                                                                                                                                                                            | 1909      | 1832       | 1356    | 1472     |                                                                                                                       |
| [Re(CO) <sub>2</sub> (bpy)(MeCN)(py)] <sup>+</sup>                                                                                                                                                                                                                             | 1937      | 1863       | 1402    | 1516     |                                                                                                                       |
| [Re(CO) <sub>2</sub> (bpy)(MeCN) <sub>2</sub> ] <sup>+</sup>                                                                                                                                                                                                                   | 1928      | 1854       | 1388    | 1501     |                                                                                                                       |
| [Re(CO) <sub>2</sub> (bpy)(P(OCH <sub>3</sub> )Ph <sub>2</sub> ) <sub>2</sub> ] <sup>+</sup>                                                                                                                                                                                   | 1949      | 1879       | 1426    | 1534     |                                                                                                                       |
| [Re(CO) <sub>2</sub> (bpy)(P(OMe) <sub>2</sub> Ph) <sub>2</sub> ] <sup>+</sup>                                                                                                                                                                                                 | 1957      | 1886       | 1437    | 1547     |                                                                                                                       |
| [Re(CO) <sub>2</sub> (bpy)(P(OMe) <sub>3</sub> ) <sub>2</sub> ] <sup>+</sup>                                                                                                                                                                                                   | 1961      | 1888       | 1440    | 1553     |                                                                                                                       |
| [Re(CO) <sub>2</sub> (bpy)(PPh <sub>3</sub> ) <sub>2</sub> ] <sup>+</sup>                                                                                                                                                                                                      | 1938      | 1868       | 1409    | 1517     |                                                                                                                       |
| [Re(CO) <sub>2</sub> (bpy)(PPh <sub>3</sub> ) <sub>2</sub> ] <sup>+</sup>                                                                                                                                                                                                      | 1938      | 1868       | 1409    | 1517     |                                                                                                                       |
| [Re(CO) <sub>2</sub> (bpy) <sub>2</sub> ] <sup>+</sup>                                                                                                                                                                                                                         | 1922      | 1852       | 1385    | 1492     |                                                                                                                       |
| [Re(CO) <sub>2</sub> (byp)(P(OPh) <sub>3</sub> ) <sub>2</sub> ] <sup>+</sup>                                                                                                                                                                                                   | 1985      | 1914       | 1480    | 1592     |                                                                                                                       |
| [Re(CO) <sub>2</sub> (c-dppene)(PPh <sub>3</sub> )(bpy)] <sup>+</sup>                                                                                                                                                                                                          | 1956      | 1886       | 1437    | 1545     |                                                                                                                       |
| [Re(CO) <sub>2</sub> (c-dppene)(PPh <sub>3</sub> )(phen)] <sup>+</sup>                                                                                                                                                                                                         | 1960      | 1890       | 1443    | 1552     |                                                                                                                       |
| [Re(CO) <sub>2</sub> (dmbpy)(P(O-i-Pr) <sub>3</sub> ) <sub>2</sub> ] <sup>+</sup>                                                                                                                                                                                              | 1946      | 1871       | 1414    | 1530     |                                                                                                                       |
| [Re(CO) <sub>2</sub> (dmbpy)(P(p-FPh) <sub>3</sub> ) <sub>2</sub> ] <sup>+</sup>                                                                                                                                                                                               | 1939      | 1869       | 1411    | 1519     |                                                                                                                       |
| [Re(CO) <sub>2</sub> (dmbpy)(PPh <sub>3</sub> ) <sub>2</sub> ] <sup>+</sup>                                                                                                                                                                                                    | 1936      | 1865       | 1405    | 1514     |                                                                                                                       |
| [Re(CO) <sub>2</sub> (dppm)(bpy)] <sup>+</sup>                                                                                                                                                                                                                                 | 1950      | 1884       | 1434    | 1536     |                                                                                                                       |
| [Re(CO) <sub>2</sub> (dppm) <sub>2</sub> (bpy)] <sup>+</sup>                                                                                                                                                                                                                   | 1940      | 1869       | 1411    | 1520     |                                                                                                                       |
| [Re(CO) <sub>2</sub> (Ph <sub>2</sub> phen)(c-dppene)] <sup>+</sup>                                                                                                                                                                                                            | 1958      | 1889       | 1441    | 1549     |                                                                                                                       |

|                                                                                                                                                      |      |      |      |      |                                                                                                                        |
|------------------------------------------------------------------------------------------------------------------------------------------------------|------|------|------|------|------------------------------------------------------------------------------------------------------------------------|
| [Re(CO) <sub>2</sub> (Ph <sub>2</sub> phen)(dppm)] <sup>+</sup>                                                                                      | 1949 | 1883 | 1432 | 1534 |                                                                                                                        |
| [Re(CO) <sub>2</sub> (phen)(c-dppene)] <sup>+</sup>                                                                                                  | 1959 | 1889 | 1441 | 1550 |                                                                                                                        |
| [Re(CO) <sub>2</sub> (phen)(P(OPh) <sub>3</sub> ) <sub>2</sub> ] <sup>+</sup>                                                                        | 1984 | 1914 | 1480 | 1590 |                                                                                                                        |
| [Re(CO) <sub>2</sub> (phen) <sub>2</sub> ] <sup>+</sup>                                                                                              | 1922 | 1853 | 1387 | 1492 |                                                                                                                        |
| [Re(CO) <sub>2</sub> (t-dppene) <sub>2</sub> (bpy)] <sup>+</sup>                                                                                     | 1942 | 1873 | 1417 | 1523 |                                                                                                                        |
| Re(CO) <sub>2</sub> (deeb)(Cl)(PMe <sub>3</sub> )                                                                                                    | 1920 | 1848 | 1379 | 1489 | D. K. Kurtz, K. R. Brereton, K. P. Rufft, H. M. Tang, G. A.                                                            |
| [Re(CO) <sub>2</sub> (deeb)(MeCN)(PMe <sub>3</sub> )] <sup>+</sup>                                                                                   | 1943 | 1873 | 1417 | 1525 | N. Felton, A. J. M. Miller and J. L. Dempsey<br><i>Inorg. Chem.</i> , 57 (2018) 5389-5399                              |
| [Re(CO) <sub>2</sub> (bpy)(P(OEt) <sub>3</sub> )(MeCN)] <sup>+</sup>                                                                                 | 1954 | 1878 | 1425 | 1542 | K. Koike, J. Tanabe, S. Toyama, H. Tsubaki, K. Sakamoto,                                                               |
| [Re(CO) <sub>2</sub> (bpy)(P(OEt) <sub>3</sub> )(py)] <sup>+</sup>                                                                                   | 1945 | 1871 | 1414 | 1528 | J. R. Westwell, F. P. A. Johnson, H. Hori, H Saitoh and O. Ishitani,                                                   |
| [Re(CO) <sub>2</sub> (bpy)(P(OEt) <sub>3</sub> )(PPh <sub>3</sub> )] <sup>+</sup>                                                                    | 1948 | 1876 | 1422 | 1533 | <i>Inorg. Chem.</i> , 39 (2000) 2777-2783                                                                              |
| [Re(CO) <sub>2</sub> (bpy)(P(OEt) <sub>3</sub> ) <sub>2</sub> ] <sup>+</sup>                                                                         | 1956 | 1881 | 1429 | 1545 |                                                                                                                        |
| [Re(CO) <sub>2</sub> (bpy)(P(OEt) <sub>3</sub> )Cl]                                                                                                  | 1936 | 1857 | 1393 | 1514 |                                                                                                                        |
| [Re(CO) <sub>2</sub> (bpy)(PPh <sub>3</sub> )(MeCN)] <sup>+</sup>                                                                                    | 1944 | 1872 | 1416 | 1527 |                                                                                                                        |
| [Re(CO) <sub>2</sub> (bpy)(PPh <sub>3</sub> ) <sub>2</sub> ] <sup>+</sup>                                                                            | 1938 | 1867 | 1408 | 1517 |                                                                                                                        |
| [Re(CO) <sub>2</sub> (Me <sub>2</sub> bpy)(P(OEt) <sub>3</sub> )(PPh <sub>3</sub> )] <sup>+</sup>                                                    | 1946 | 1873 | 1417 | 1530 |                                                                                                                        |
| [Re(CO) <sub>2</sub> (Me <sub>2</sub> bpy)(P(OEt) <sub>3</sub> )(PPh <sub>3</sub> )] <sup>+</sup>                                                    | 1944 | 1865 | 1405 | 1527 |                                                                                                                        |
| [Re(CO) <sub>2</sub> (Me <sub>2</sub> bpy)(P(OEt) <sub>3</sub> ) <sub>2</sub> ] <sup>+</sup>                                                         | 1954 | 1879 | 1426 | 1542 |                                                                                                                        |
| [Re(CO) <sub>2</sub> ((CF <sub>3</sub> ) <sub>2</sub> bpy)(P(OEt) <sub>3</sub> ) <sub>2</sub> ] <sup>+</sup>                                         | 1963 | 1891 | 1444 | 1556 |                                                                                                                        |
| [Re(CO) <sub>2</sub> (bpy)(P(OEt) <sub>3</sub> ) <sub>2</sub> ] <sup>+</sup><br>(Br <sup>-</sup> /CH <sub>2</sub> Cl <sub>2</sub> )                  | 1956 | 1882 | 1431 | 1545 | O. Ishitani, M. W. George, T. Ibusuki, F. P. A. Johnson, K. Koike, K. Nozaki, C. Pac, J. J. Turner and J. R. Westwell, |
| [Re(CO) <sub>2</sub> (bpy)(P(OEt) <sub>3</sub> ) <sub>2</sub> ] <sup>+</sup><br>(Br <sup>-</sup> /CH <sub>3</sub> CN)                                | 1956 | 1881 | 1429 | 1545 | <i>Inorg. Chem.</i> , 33 (1994) 4712-4717                                                                              |
| [Re(CO) <sub>2</sub> (bpy)(P(OEt) <sub>3</sub> ) <sub>2</sub> ] <sup>+</sup><br>(Br <sup>-</sup> /DMF)                                               | 1953 | 1879 | 1426 | 1541 |                                                                                                                        |
| [Re(CO) <sub>2</sub> (bpy)(P(OEt) <sub>3</sub> ) <sub>2</sub> ] <sup>+</sup><br>([BPh <sub>4</sub> ] <sup>-</sup> /CH <sub>2</sub> Cl <sub>2</sub> ) | 1957 | 1884 | 1434 | 1547 |                                                                                                                        |
| [Re(CO) <sub>2</sub> (bpy)(P(OEt) <sub>3</sub> ) <sub>2</sub> ] <sup>+</sup><br>([BPh <sub>4</sub> ] <sup>-</sup> /CH <sub>3</sub> CN)               | 1955 | 1881 | 1429 | 1544 |                                                                                                                        |

|                                                                                                                         |      |      |      |      |                                                                                                                            |
|-------------------------------------------------------------------------------------------------------------------------|------|------|------|------|----------------------------------------------------------------------------------------------------------------------------|
| [Re(CO) <sub>2</sub> (bpy)(P(OEt) <sub>3</sub> ) <sub>2</sub> ] <sup>+</sup><br>([BPh <sub>4</sub> ] <sup>-</sup> /DMF) | 1953 | 1879 | 1426 | 1541 |                                                                                                                            |
| [Re(CO) <sub>2</sub> (dmbpy)(P(MeOPh) <sub>3</sub> ) <sub>2</sub> ] <sup>+</sup>                                        | 1902 | 1825 | 1345 | 1461 | H. Tsubaki, A. Sekine, Y. Ohashi, K. Koike, H. Takeda and O. Ishitani<br><i>J. Am. Chem. Soc.</i> , 127 (2005) 15544-15555 |
| [Re(CO) <sub>2</sub> (dmbpy)(P(MeOPh) <sub>3</sub> ) <sub>2</sub> ]                                                     | 1930 | 1859 | 1396 | 1505 |                                                                                                                            |
| [Re(CO) <sub>2</sub> (dmbpy)(P(MeOPh)(PPh <sub>3</sub> )) <sup>+</sup>                                                  | 1933 | 1861 | 1399 | 1509 |                                                                                                                            |
| [Re(CO) <sub>2</sub> (dmbpy)(PPh <sub>3</sub> ) <sub>2</sub> ]                                                          | 1908 | 1830 | 1353 | 1470 |                                                                                                                            |
| [Re(CO) <sub>2</sub> (dmbpy)(PPh <sub>3</sub> ) <sub>2</sub> ] <sup>+</sup>                                             | 1936 | 1865 | 1405 | 1514 |                                                                                                                            |
| [Re(CO) <sub>2</sub> (dmbpy)(P(FPh) <sub>3</sub> (PPh <sub>3</sub> )) <sup>+</sup>                                      | 1937 | 1867 | 1408 | 1516 |                                                                                                                            |
| [Re(CO) <sub>2</sub> (dmbpy)(P(FPh) <sub>3</sub> ) <sub>2</sub> ]                                                       | 1910 | 1834 | 1359 | 1474 |                                                                                                                            |
| [Re(CO) <sub>2</sub> (dmbpy)(P(FPh) <sub>3</sub> ) <sub>2</sub> ] <sup>+</sup>                                          | 1939 | 1869 | 1411 | 1519 |                                                                                                                            |
| [Re(CO) <sub>2</sub> (dmbpy)(P(ClPh) <sub>3</sub> ) <sub>2</sub> ]                                                      | 1912 | 1837 | 1363 | 1477 |                                                                                                                            |
| [Re(CO) <sub>2</sub> (dmbpy)(P(ClPh) <sub>3</sub> ) <sub>2</sub> ] <sup>+</sup>                                         | 1942 | 1872 | 1416 | 1523 |                                                                                                                            |
| [Re(CO) <sub>2</sub> (dmpy)(P(MeOPh) <sub>3</sub> (P(OPr) <sub>3</sub> )) <sup>+</sup>                                  | 1939 | 1865 | 1405 | 1519 |                                                                                                                            |
| [Re(CO) <sub>2</sub> (dmbpy)(PPh <sub>3</sub> )(P(OEt) <sub>3</sub> )]                                                  | 1917 | 1840 | 1368 | 1484 |                                                                                                                            |
| [Re(CO) <sub>2</sub> (dmbpy)(PPh <sub>3</sub> )(P(OEt) <sub>3</sub> ) <sup>+</sup>                                      | 1945 | 1872 | 1416 | 1528 |                                                                                                                            |
| [Re(CO) <sub>2</sub> (dmbpy)(P(OPr) <sub>3</sub> ) <sub>2</sub> ]                                                       | 1919 | 1840 | 1368 | 1487 |                                                                                                                            |
| [Re(CO) <sub>2</sub> (dmbpy)(P(OPr) <sub>3</sub> ) <sub>2</sub> ] <sup>+</sup>                                          | 1946 | 1871 | 1414 | 1530 |                                                                                                                            |
| [Re(CO) <sub>2</sub> (dmbpy)(POEt) <sub>3</sub> ) <sub>2</sub> ] <sup>+</sup>                                           | 1953 | 1879 | 1426 | 1541 |                                                                                                                            |
| [Re(CO) <sub>2</sub> (dmbpy)(P(OEt) <sub>3</sub> )(P(OMe) <sub>3</sub> ) <sup>+</sup>                                   | 1956 | 1882 | 1431 | 1545 |                                                                                                                            |

$$K(a') = 0.9525 \times K(a'') + 178.9$$

(62 data points; R<sup>2</sup> = 0.9748)

### 2.3 *mer* – M(CO)<sub>3</sub>L<sub>3</sub> complexes (M = Cr, Mo, W)

For these species the ideal data would be obtained from *trans* – M(CO)<sub>2</sub>L<sub>4</sub> molecules, but unfortunately, such information is sparse, so it is necessary to proceed in a roundabout way. The EFFF constants for a range of M(CO)<sub>5</sub>L have been obtained *via* isotopic substitution:  $k_{ax}, k_{eq}, k_{ax,eq}, k_{eq,eq}^{cis}, k_{eq,eq}^{trans}$ . Assuming that for a set of theoretical *trans*-M(CO)<sub>2</sub>L<sub>4</sub> molecules, we can use  $k_{eq}$  and  $k_{eq,eq}^{trans}$  it becomes possible to predict the  $K(a_1)$  and  $K(b_2)$  values for these hypothetical dicarbonyls. Table S4 shows the calculation of these values

| <b>Table S4: <math>M(CO)_5L</math> molecules used to calculate the <math>K(a_1)</math> and <math>K(b_2)</math> values of the theoretical <math>trans-M(CO)_2L_4</math> species en route to <math>mer-M(CO)_3L_3</math> systems</b> |          |          |                                                                                                                                                                                                                                                 |
|------------------------------------------------------------------------------------------------------------------------------------------------------------------------------------------------------------------------------------|----------|----------|-------------------------------------------------------------------------------------------------------------------------------------------------------------------------------------------------------------------------------------------------|
| <b>Molecule</b>                                                                                                                                                                                                                    | $K(a_1)$ | $K(b_1)$ | Ref.                                                                                                                                                                                                                                            |
| $Mo(CO)_5(PPh_3)$                                                                                                                                                                                                                  | 1655     | 1537     | D. J. Darensbourg and M. A. Murphy,<br><i>J. Am. Chem. Soc.</i> , 100 (1978) 463-468                                                                                                                                                            |
| $Cr(CO)_6$ ( $^{13}C^{18}O$ $CH_4$ 20K)                                                                                                                                                                                            | 1699     | 1593     | J. A. Timney<br><i>PhD Thesis, Newcastle University</i> 1980                                                                                                                                                                                    |
| $Cr(CO)_6$ ( $^{13}CO$ $CH_4$ 20K)                                                                                                                                                                                                 | 1696     | 1592     | R. N. Perutz and J. J. Turner<br><i>Inorg. Chem.</i> , 14 (1975) 262-270                                                                                                                                                                        |
| $Cr(CO)_6$ ( $^{13}CO$ Ar 20K)                                                                                                                                                                                                     | 1702     | 1598     |                                                                                                                                                                                                                                                 |
| $Cr(CO)_6$ ( $^{13}CO$ cyclohexane)                                                                                                                                                                                                | 1695     | 1592     |                                                                                                                                                                                                                                                 |
| $Cr(CO)_6$ ( $^{13}CO$ alkane)                                                                                                                                                                                                     | 1700     | 1592     |                                                                                                                                                                                                                                                 |
| $Mo(CO)_6$ ( $^{13}CO$ $CH_4$ 20K)                                                                                                                                                                                                 | 1700     | 1594     |                                                                                                                                                                                                                                                 |
| $W(CO)_6$ ( $^{13}CO$ $CH_4$ 20K)                                                                                                                                                                                                  | 1693     | 1585     |                                                                                                                                                                                                                                                 |
| $Cr(CO)_5(CS)$                                                                                                                                                                                                                     | 1724     | 1631     | M. Poliakoff<br><i>Inorg. Chem.</i> , 15 (1976) 2022-2031                                                                                                                                                                                       |
| $Cr(CO)_5(NHC_5H_{10})$                                                                                                                                                                                                            | 1642     | 1510     | D. J. Darensbourg and M. A. Murphy,<br><i>Inorg. Chem.</i> , 17 (1978) 884-888                                                                                                                                                                  |
| $Cr(CO)_5(H_2)$                                                                                                                                                                                                                    | 1689     | 1575     | R. K. Upmacis, M. Poliakoff and J. J. Turner<br><i>J. Am. Chem. Soc.</i> , 108 (1986) 3645-3651                                                                                                                                                 |
| $Mo(CO)_5(H_2)$                                                                                                                                                                                                                    | 1694     | 1581     |                                                                                                                                                                                                                                                 |
| $W(CO)_5(H_2)$                                                                                                                                                                                                                     | 1684     | 1571     |                                                                                                                                                                                                                                                 |
| $Cr(CO)_5$ ( $^{13}CO$ $CH_4$ 20K)                                                                                                                                                                                                 | 1674     | 1554     | R. N. Perutz and J. J. Turner<br><i>Inorg. Chem.</i> , 14 (1975) 262-270                                                                                                                                                                        |
| $Cr(CO)_5$ ( $^{13}CO$ Ar 20K)                                                                                                                                                                                                     | 1681     | 1561     |                                                                                                                                                                                                                                                 |
| $Mo(CO)_5$ ( $^{13}CO$ $CH_4$ 20K)                                                                                                                                                                                                 | 1681     | 1563     |                                                                                                                                                                                                                                                 |
| $W(CO)_5$ ( $^{13}CO$ $CH_4$ 20K)                                                                                                                                                                                                  | 1671     | 1547     |                                                                                                                                                                                                                                                 |
| $Mo(CO)_5(N_2)$ 1                                                                                                                                                                                                                  | 1692     | 1580     | J. K. Burdett, A. J. Downs, G. P. Gaskill, M. A. Graham, J. J. Turner and R. F. Turner<br><i>Inorg. Chem.</i> , 17 (1978) 523-532<br>The multiple values for $Mo(CO)_5(N_2)$ arise from the different ways the force constants were calculated. |
| $Mo(CO)_5(N_2)$ 2                                                                                                                                                                                                                  | 1687     | 1580     |                                                                                                                                                                                                                                                 |
| $Mo(CO)_5(N_2)$ 3                                                                                                                                                                                                                  | 1689     | 1581     |                                                                                                                                                                                                                                                 |
| $Mo(CO)_5(N_2)$ 4                                                                                                                                                                                                                  | 1691     | 1581     |                                                                                                                                                                                                                                                 |

$$K(a_1) = 0.6771 \times K(b_2) + 620.5$$

(21 data points,  $R^2 = 0.9804$ )

### 3 Tetracarbonyls

#### 3.1 *cis*-M(CO)<sub>4</sub>L<sub>2</sub> complexes (M = Cr, Mo, W)

There are two approaches (the  $b_2$  method and the  $b_1$  method) to finding EFFF force constants for these molecules.

The secular equations for these molecules are:

$$a_1: \begin{vmatrix} k_1 + k_{11} - K & 2k_{12} \\ 2k_{12} & k_2 - K \end{vmatrix} = 0$$

$$b_1: K(b_1) = k_1 - k_{11}$$

$$b_2: K(b_2) = k_2 - k_{22}$$

We start with data for  $K(a_1)$  and  $K(b_2)$  for *cis*-M(CO)<sub>2</sub>(L)<sub>4</sub> complexes (M = Cr, Mo, W). (Table S5a). This is rather limited but we can also use the isotopic data for M(CO)<sub>5</sub>L systems, as for the *mer*-M(CO)<sub>3</sub>L<sub>3</sub>, but this time calculate the theoretical *cis*-M(CO)<sub>2</sub>L<sub>4</sub>  $K(a_1)$  and  $K(b_2)$  data. These calculations are shown in Table S5b. In fact, there was no statistical difference between the results for the two approaches, and the 32 data points give an excellent straight-line plot

$$K(a_1) = 0.8507 \times K(b_2) + 296.7$$

(32 data points,  $R^2 = 0.9981$ )

| Table S5a: <i>cis</i> -M(CO) <sub>2</sub> (L) <sub>4</sub> (M = Cr, Mo, W) molecules used to calculate EFFFs for <i>cis</i> -M(CO) <sub>4</sub> (L) <sub>2</sub> (using the $b_2$ mode) |            |            |          |          |                                                                                                      |
|-----------------------------------------------------------------------------------------------------------------------------------------------------------------------------------------|------------|------------|----------|----------|------------------------------------------------------------------------------------------------------|
| Molecule                                                                                                                                                                                | $\nu(a_1)$ | $\nu(b_2)$ | $K(a_1)$ | $K(b_2)$ | Ref.                                                                                                 |
| Mo(CO) <sub>2</sub> (PF <sub>3</sub> ) <sub>4</sub>                                                                                                                                     | 2048       | 2010       | 1694     | 1632     | P. S. Braterman,<br>"Metal Carbonyl Spectra"<br>Table 7.13 (p206) and references therein             |
| Mo(CO) <sub>2</sub> (P(OMe) <sub>3</sub> ) <sub>4</sub>                                                                                                                                 | 1909       | 1856       | 1472     | 1391     |                                                                                                      |
| Cr(CO) <sub>2</sub> (phen)(P(OEt) <sub>3</sub> ) <sub>2</sub>                                                                                                                           | 1827       | 1743       | 1348     | 1227     |                                                                                                      |
| Mo(CO) <sub>2</sub> (phen)(P(OEt) <sub>3</sub> ) <sub>2</sub>                                                                                                                           | 1872       | 1790       | 1416     | 1294     |                                                                                                      |
| W(CO) <sub>2</sub> (phen)(P(OEt) <sub>3</sub> ) <sub>2</sub>                                                                                                                            | 1825       | 1740       | 1345     | 1223     |                                                                                                      |
| Mo(CO) <sub>2</sub> (dppe) <sub>2</sub>                                                                                                                                                 | 1850       | 1783       | 1382     | 1284     | J. R. Sowa, J. B. Bonanno, V. Zanotti, and R. J. Angelici<br><i>Inorg. Chem.</i> 31 (1992) 1370-1375 |
| Mo(CO) <sub>2</sub> (dppp) <sub>2</sub>                                                                                                                                                 | 1857       | 1790       | 1393     | 1294     |                                                                                                      |
| Mo(CO) <sub>2</sub> (arphos) <sub>2</sub>                                                                                                                                               | 1848       | 1778       | 1379     | 1277     |                                                                                                      |
| Mo(CO) <sub>2</sub> (dmpe) <sub>2</sub>                                                                                                                                                 | 1836       | 1766       | 1362     | 1260     |                                                                                                      |
| W(CO) <sub>2</sub> (dppe) <sub>2</sub>                                                                                                                                                  | 1851       | 1781       | 1384     | 1281     |                                                                                                      |
| Mo(CO) <sub>2</sub> (diars) <sub>2</sub>                                                                                                                                                | 1887       | 1828       | 1438     | 1350     |                                                                                                      |



| <b>Table S5b: Hypothetical <i>cis</i>-M(CO)<sub>2</sub>(L)<sub>4</sub> (M = Cr, Mo, W) molecules calculated from isotopic data used to calculate EFFFs for <i>cis</i>-M(CO)<sub>4</sub>(L)<sub>2</sub> (using the <i>b</i><sub>2</sub> mode)</b> |                                    |                                    |                                                                                                                                   |
|--------------------------------------------------------------------------------------------------------------------------------------------------------------------------------------------------------------------------------------------------|------------------------------------|------------------------------------|-----------------------------------------------------------------------------------------------------------------------------------|
| <b>Molecule</b>                                                                                                                                                                                                                                  | <i>K</i> ( <i>a</i> <sub>1</sub> ) | <i>K</i> ( <i>b</i> <sub>2</sub> ) | Ref.                                                                                                                              |
| Mo(CO) <sub>5</sub> (PPh <sub>3</sub> )                                                                                                                                                                                                          | 1628                               | 1564                               | D. J. Darensbourg and M. A. Murphy,<br><i>J. Am. Chem. Soc.</i> , 100 (1978) 463-468                                              |
| Cr(CO) <sub>6</sub> ( <sup>13</sup> C <sup>18</sup> O CH <sub>4</sub> 20K)                                                                                                                                                                       | 1672                               | 1619                               | J. A. Timney<br><i>PhD Thesis, Newcastle University 1980</i>                                                                      |
| Cr(CO) <sub>6</sub> ( <sup>13</sup> CO CH <sub>4</sub> 20K)                                                                                                                                                                                      | 1671                               | 1618                               | R. N. Perutz and J. J. Turner<br><i>Inorg. Chem.</i> , 14 (1975) 262-270                                                          |
| Cr(CO) <sub>6</sub> ( <sup>13</sup> CO Ar 20K)                                                                                                                                                                                                   | 1676                               | 1624                               |                                                                                                                                   |
| Cr(CO) <sub>6</sub> ( <sup>13</sup> CO cyclohexane)                                                                                                                                                                                              | 1669                               | 1617                               |                                                                                                                                   |
| Cr(CO) <sub>6</sub> ( <sup>13</sup> CO alkane)                                                                                                                                                                                                   | 1672                               | 1620                               |                                                                                                                                   |
| Mo(CO) <sub>6</sub> ( <sup>13</sup> CO CH <sub>4</sub> 20K)                                                                                                                                                                                      | 1675                               | 1619                               |                                                                                                                                   |
| W(CO) <sub>6</sub> ( <sup>13</sup> CO CH <sub>4</sub> 20K)                                                                                                                                                                                       | 1669                               | 1609                               |                                                                                                                                   |
| Cr(CO) <sub>5</sub> (CS)                                                                                                                                                                                                                         | 1701                               | 1654                               | M. Poliakoff<br><i>Inorg. Chem.</i> , 15 (1976) 2022-2031                                                                         |
| Cr(CO) <sub>5</sub> (NHC <sub>5</sub> H <sub>10</sub> )                                                                                                                                                                                          | 1606                               | 1546                               | D. J. Darensbourg and M. A. Murphy,<br><i>Inorg. Chem.</i> , 17 (1978) 884-888                                                    |
| Cr(CO) <sub>5</sub> (H <sub>2</sub> )                                                                                                                                                                                                            | 1661                               | 1603                               | R. K. Upmacis, M. Poliakoff and J. J. Turner<br><i>J. Am. Chem. Soc.</i> , 108 (1986) 3645-3651                                   |
| Mo(CO) <sub>5</sub> (H <sub>2</sub> )                                                                                                                                                                                                            | 1668                               | 1608                               |                                                                                                                                   |
| W(CO) <sub>5</sub> (H <sub>2</sub> )                                                                                                                                                                                                             | 1659                               | 1596                               |                                                                                                                                   |
| Cr(CO) <sub>5</sub> ( <sup>13</sup> CO CH <sub>4</sub> 20K)                                                                                                                                                                                      | 1644                               | 1583                               | R. N. Perutz and J. J. Turner<br><i>Inorg. Chem.</i> , 14 (1975) 262-270                                                          |
| Cr(CO) <sub>5</sub> ( <sup>13</sup> CO Ar 20K)                                                                                                                                                                                                   | 1652                               | 1591                               |                                                                                                                                   |
| Mo(CO) <sub>5</sub> ( <sup>13</sup> CO CH <sub>4</sub> 20K)                                                                                                                                                                                      | 1653                               | 1590                               |                                                                                                                                   |
| W(CO) <sub>5</sub> ( <sup>13</sup> CO CH <sub>4</sub> 20K)                                                                                                                                                                                       | 1643                               | 1575                               |                                                                                                                                   |
| Mo(CO) <sub>5</sub> (N <sub>2</sub> ) 1                                                                                                                                                                                                          | 1665                               | 1607                               | J. K. Burdett, A. J. Downs, G. P. Gaskill, M. A. Graham, J. J. Turner and R. F. Turner<br><i>Inorg. Chem.</i> , 17 (1978) 523-532 |
| Mo(CO) <sub>5</sub> (N <sub>2</sub> ) 2                                                                                                                                                                                                          | 1660                               | 1608                               |                                                                                                                                   |
| Mo(CO) <sub>5</sub> (N <sub>2</sub> ) 3                                                                                                                                                                                                          | 1662                               | 1608                               |                                                                                                                                   |

|                                                    |      |      |  |
|----------------------------------------------------|------|------|--|
| Mo(CO) <sub>5</sub> (N <sub>2</sub> ) <sub>4</sub> | 1663 | 1608 |  |
|----------------------------------------------------|------|------|--|

We can now use the two methods to predict values for M(CO)<sub>4</sub>L<sub>2</sub>

### 3.1.1 The *b*<sub>2</sub> method

We need **two** of the CO groups in *cis*-M(CO)<sub>4</sub>(L)<sub>2</sub> to be silenced this time, giving *cis*-M(CO)<sub>2</sub>(CO)<sub>2</sub>(L)<sub>2</sub>. The *b*<sub>2</sub> mode of this molecule is identical to the *b*<sub>2</sub> mode in the *cis*-M(CO)<sub>2</sub>(L)<sub>4</sub> complex so we can calculate a  $K(\underline{a}_1)$  for this molecule and thus the force constants for the equatorial CO groups.

$$k_2 = \frac{1}{2}(K(\underline{a}_1) + K(b_2)) \qquad k_{22} = \frac{1}{2}(K(\underline{a}_1) - K(b_2))$$

Having *k*<sub>2</sub> and *k*<sub>22</sub> we can now calculate the remaining three force constants in *cis*-M(CO)<sub>4</sub>(L)<sub>2</sub>.

$$k_1 = [K(a_1)_1 + K(a_1)_2 + K(b_1) + K(b_2) - 2k_2]/2 \qquad k_{11} = k_1 - K(b_1)$$

$$k_{12} = \sqrt{\frac{[k_1 + k_{11} - K(a_1)_1][k_2 + k_{22} - K(a_1)_1]}{4}}$$

### 3.1.2 The *b*<sub>1</sub> method

This second approach is only slightly different to the *b*<sub>2</sub> method. We need to start with molecules of the general formula *trans*-M(CO)<sub>2</sub>(L)<sub>4</sub>. Unfortunately, the experimental data for such complexes is lacking so we use the same data we used in the case of *mer*-M(CO)<sub>3</sub>(L)<sub>3</sub> (Table S4). These give the force constants for the *a*<sub>1</sub> and *b*<sub>1</sub> modes of the hypothetical molecules *trans*-M(CO)<sub>2</sub>(CO)<sub>3</sub>(L) where the two vibrating CO groups are *trans* to one another (and there are three non-vibrating, “silent” CO groups). So, starting with the *b*<sub>1</sub> mode in *cis*-M(CO)<sub>4</sub>(L)<sub>2</sub>, and again silencing two of the CO groups, the **reference line** is:

$$K(\underline{a}_1) = 0.6771 \times K(b_1) + 620.5 \quad (\text{the same as for } mer\text{-M(CO)}_3\text{(L)}_3 \text{ complexes})$$

and the procedure is identical only this time *k*<sub>1</sub> and *k*<sub>11</sub> are calculated first.

The *cis*-M(CO)<sub>4</sub>(L)<sub>2</sub> carbonyls are a good test of the silent CO method and the force constants calculated using the *b*<sub>2</sub> method and the *b*<sub>1</sub> method are reassuringly close. The case of W(CO)<sub>4</sub>(diphos) is highlighted in the main text.

## 3.2 C<sub>3v</sub> and C<sub>2v</sub> Fe(CO)<sub>4</sub>L complexes

### 3.2.1 C<sub>3v</sub> symmetry Fe(CO)<sub>4</sub>(L) where L is axial

A large number of ligands replace an *axial*-CO group in Fe(CO)<sub>5</sub> to produce the C<sub>3v</sub> isomer of Fe(CO)<sub>4</sub>(L). The same is true of the corresponding ruthenium and osmium complexes. This configuration, yet again, has an underdetermined force field with three frequencies ( $2a_1 + e$ ) and four force constants ( $k_1, k_2, k_{11}, k_{12}$ ).

The secular equations are:

$$a_1: \begin{vmatrix} k_1 + 2k_{11} - K & \sqrt{3}k_{12} \\ \sqrt{3}k_{12} & k_2 - K \end{vmatrix} = 0$$

$$e: K(e) = k_1 - k_{11}$$

The reference line for this class of compounds would ideally have originated from data from *trans*-M(CO)<sub>3</sub>(L)<sub>2</sub> or *trans*-M(CO)<sub>3</sub>(L)(L') species and M(CO)<sub>2</sub>(L)<sub>3</sub> complexes (M = Fe, Ru, Os) with all CO groups in equatorial positions.

So once again we resort to isotopic data, this time for axially-substituted Fe(CO)<sub>4</sub>(phosphine) and equatorially-substituted Fe(CO)<sub>4</sub>(olefin) complexes. Employing the  $k_1$  and  $k_{11}$  ( $k_{eq}$  and  $k_{eq,eq}$ ) numbers permits prediction of the two frequencies, and hence  $K$  values, for the theoretical C<sub>2v</sub> Fe(CO)<sub>2</sub>L<sub>3</sub> systems. These numbers are given in Table S6.

This produces a reference line:

$$K(a_1) = 0.8076 \times K(e) + 387.3$$

(13 points, R<sup>2</sup> = 0.9946)

| Table S6: Hypothetical C <sub>2v</sub> -Fe(CO) <sub>2</sub> (L) <sub>4</sub> data calculated from isotopic data |                    |      |                                                                                             |
|-----------------------------------------------------------------------------------------------------------------|--------------------|------|---------------------------------------------------------------------------------------------|
| Molecule                                                                                                        | K(a <sub>1</sub> ) | K(e) | Ref.                                                                                        |
| Fe(CO) <sub>5</sub>                                                                                             | 1697               | 1617 | G. Bor<br><i>Inorg. Chim. Acta</i> , 3 (1969) 191-195                                       |
| Fe(CO) <sub>2</sub> (PF <sub>3</sub> ) <sub>3</sub> [C <sub>2v</sub> isomer]                                    | 1679               | 1595 | R. J. Clark<br><i>Inorg. Chem.</i> , 3 (1964) 1395-1398                                     |
| Fe(CO) <sub>4</sub> (PPh <sub>3</sub> )                                                                         | 1616               | 1526 | D. J. Darensbourg, H. H. Nelson and C. L. Hyde<br><i>Inorg. Chem.</i> , 13 (1975) 2135-2145 |
| Fe(CO) <sub>4</sub> (PPhMe <sub>2</sub> )                                                                       | 1610               | 1516 |                                                                                             |
| Fe(CO) <sub>4</sub> (P(OPh) <sub>3</sub> )                                                                      | 1637               | 1547 |                                                                                             |
| Fe(CO) <sub>4</sub> (P(OMe) <sub>3</sub> )                                                                      | 1634               | 1542 |                                                                                             |
| Fe(CO) <sub>4</sub> (PPh <sub>2</sub> OMe)                                                                      | 1625               | 1531 |                                                                                             |
| Fe(CO) <sub>4</sub> (P <i>n</i> -Bu <sub>3</sub> )                                                              | 1607               | 1509 |                                                                                             |
| Fe(CO) <sub>4</sub> (CH <sub>2</sub> =CHCOCl)                                                                   | 1666               | 1734 |                                                                                             |
| Fe(CO) <sub>4</sub> (CH <sub>2</sub> =CHCOOH)                                                                   | 1655               | 1715 |                                                                                             |
| Fe(CO) <sub>4</sub> (CH <sub>2</sub> =CHCONC <sub>5</sub> H <sub>10</sub> )                                     | 1629               | 1701 |                                                                                             |
| Fe(CO) <sub>4</sub> (CH <sub>2</sub> =CHCN)                                                                     | 1664               | 1732 |                                                                                             |

|                     |      |      |                                                                                                                    |
|---------------------|------|------|--------------------------------------------------------------------------------------------------------------------|
| Fe(CO) <sub>5</sub> | 1695 | 1615 | P. Portius, M. Bühl, M. W. George, F-W Grevels and James J. Turner<br><i>Organometallics</i> , 38 (2019) 4288–4297 |
|---------------------|------|------|--------------------------------------------------------------------------------------------------------------------|

This reference line allows us to calculate the force constants in a  $C_{3v}$  tetracarbonyl by making  $K(b_2) = K(e)$  and calculating a value for  $K(\underline{a}_1)$  (as before) so the force constants are:

$$k_1 = \frac{1}{2}(K(\underline{a}_1) + K(e))$$

$$k_{11} = \frac{1}{2}(K(\underline{a}_1) - K(e))$$

$$k_2 = K(a_1)_1 + K(a_1)_2 + 2K(e) - 3k_1$$

$$k_{12} = \sqrt{\frac{[k_1 + 2k_{11} - K(a_1)_1][k_2 - K(a_1)_1]}{3}}$$

### 3.2.2 $C_{2v}$ symmetry Fe(CO)<sub>4</sub>(L) where L is equatorial

There are fewer M(CO)<sub>4</sub>(L) (M = Fe) complexes with a  $C_{2v}$  geometry although that number increases when the metal atom is Ru or Os. The secular equations for these molecules are identical to the  $C_{2v}$  molecules based on an octahedron with the sole difference that the reference line is the same as was used for the  $C_{3v}$  tetracarbonyls above (section 3.2.1) since the  $b_2$  mode of a  $C_{2v}$  Fe(CO)<sub>4</sub>(L) species is identical in form to the e mode of the  $C_{3v}$  tetracarbonyl. This enables us, as an example, to calculate the force constants of Fe(CO)<sub>4</sub>(CS) (data from W. Petz, *J. Organomet. Chem.* 146 (1978) C23-25) and they are shown, for comparison, alongside Fe(CO)<sub>5</sub> (for which we have force constants from isotopic data).

Force constants for Fe(CO)<sub>4</sub>(CS) and Fe(CO)<sub>5</sub>

| Molecule                                    | $k_1$ | $k_2$ | $k_{11}$ | $k_{12}$ | $k_{22}$ |
|---------------------------------------------|-------|-------|----------|----------|----------|
| Fe(CO) <sub>4</sub> (CS) [using $b_2$ mode] | 1654  | 1717  | 38       | 21       | 45       |
| Fe(CO) <sub>5</sub> [from Bor]              | 1657  | 1695  | 41       | 28       | 40       |

## 4 Pentacarbonyls

### 4.1 $C_{4v}$ M(CO)<sub>5</sub>(L) complexes (M = Cr, Mo, W) and M(CO)<sub>5</sub>(X) (M = Mn, Re)

There have been many force field studies (both approximate and from isotopic data) on the M(CO)<sub>5</sub>(L) complexes (M = Cr, Mo, W) and a significant but smaller number on M(CO)<sub>5</sub>(X) (M = Mn, Re) compounds. It was with this type of molecule that the CO-factored force field first came to be used in the 1960's. There are five force constants in the EFFF but only four possible  $\nu(CO)$  absorptions ( $2a_1 + b_2 + e$ ). The  $b_2$  mode is formally Raman-active only and is often either missing or a weak, broader absorption. It has been argued that the presence in the infrared spectrum of the  $b_2$  mode implies distortion in the molecule away from  $C_{4v}$  symmetry to  $C_s$  (with  $3a' + 2a''$  modes) and a more complicated force field. Braterman commented that, unless the ligand L possessed a four-fold axis of symmetry, the maximum possible molecular symmetry is  $C_s$  and the " $b_2$ " mode becomes allowed, although still with a low relative intensity. The force field of a  $C_s$  pentacarbonyl has eight force constants (

$k_1, k_2, k_3, k_{11}, k_{22}, k_{12}, k_{13}, k_{23}$ ) and whilst some approximations realistically might be made (e.g.  $k_{11} \approx k_{22}, k_{13} \approx k_{23}$ ) there are still three degrees of freedom.

Assuming  $C_{4v}$  symmetry, if the  $b_2$  mode is observed the force field is underdetermined with one degree of freedom, but the symmetry may be, as we have seen, effectively lower. If the  $b_2$  mode is not observed there are two degrees of freedom. Cotton's approach for the first of these scenarios was to set the *cis* interaction constant (between equatorial CO groups) equal to half the *trans* interaction constant. To cope with the second scenario,  $k_{12}$  was also set equal to the *cis* interaction constant, that is (in the notation used throughout this paper):

$$k_{11}^c = \frac{1}{2}k_{11}^t = k_{12}$$

This limitation is unnecessary with the silent-CO method.

The secular equations linking EFFF force constants with symmetry force constants are:

$$a_1: \begin{vmatrix} k_1 + k_{11}^t + 2k_{11}^c - K & 2k_{12} \\ 2k_{12} & k_2 - K \end{vmatrix} = 0$$

$$b_2: K(b_2) = k_1 - 2k_{11}^c + k_{11}^t$$

$$e: K(e) = k_1 - k_{11}^t$$

We shall treat the Group 6 metal carbonyls and Group 7 metal carbonyls separately.

#### 4.1.1 $M(CO)_5(L)$ ( $M = Cr, Mo, W$ )

The reference line for  $M(CO)_5(L)$  ( $M = Cr, Mo, W$ ) is exactly the same as for *mer*- $M(CO)_3(L)_3$  complexes and refers to the hypothetical  $M(CO)_2(\underline{CO})_3(L)$  molecule where the vibrating CO groups are mutually *trans*. So we use  $K(\underline{a}_1)$  to represent the symmetric stretch of this *trans*-dicarbonyl and  $K(e)$  from the parent pentacarbonyl).

$$K(\underline{a}_1) = 0.6771 \times K(e) + 620.5$$

This enables us to calculate  $k_1$  and  $k_{11}^t$  as though  $M(CO)_5(L)$  was a *trans*-dicarbonyl;  $M(CO)_2(\underline{CO})_3(L)$ .

$$k_1 = \frac{1}{2}(K(\underline{a}_1) + K(e)) \qquad k_{11}^t = \frac{1}{2}(K(\underline{a}_1) - K(e))$$

This removes one degree of freedom but if the  $b_2$  mode is not observed the force field is still underdetermined as  $K(b_2)$  cannot be calculated. However, the  $e$  mode and  $b_2$  mode of  $M(CO)_5(L)$  only involve the motion of the equatorial CO groups, with no complicating contribution from the axial CO group so we might expect a strong correlation between  $K(b_2)$  and  $K(e)$ , using the force constants from the  $M(CO)_5(L)$  complexes that have had a full EFFF determined. This is exactly what we find:

$$K(b_2) = 0.8492 \times K(e) + 291.9 \quad (18 \text{ data points } R^2 = 0.9863)$$

So, regardless of whether the  $b_2$  mode is observed or not, the force constants can be calculated.

$$k_2 = K(a_1)_1 + K(a_1)_2 + K(b_2) + 2K(e) - 4k_1$$

$$k_{11}^c = \frac{1}{2}(k_1 + k_{11}^t - K(b_2))$$

$$k_{12} = \sqrt{\frac{[k_1 + 2k_{11}^c + k_{11}^t - K(a_1)_1][k_2 - K(a_1)_1]}{4}}$$

#### 4.1.2 Mn(CO)<sub>5</sub>(X)

The Group 7 metals (Mn, Tc, Re) can, in theory, be treated the same way although there are far fewer force fields calculated from isotopic spectra available and consequently there is less confidence in the reference lines. The only metal where enough data exists is Mn.

To date, only Mn(CO)<sub>5-x</sub>(<sup>13</sup>CO)<sub>x</sub>H, Mn(CO)<sub>5-x</sub>(<sup>13</sup>CO)<sub>x</sub>Cl and (in a CO matrix) Mn(CO)<sub>5</sub> have been studied where the full range of substituted molecules were used to determine force constants. Earlier work by Kaesz *et al* used less <sup>13</sup>CO substitution but, nonetheless, a robust set of force constants were produced for each of the M(CO)<sub>5</sub>X molecules (M = Mn, Re; X = Cl, Br, I). Using the same reference line as the chromium group produces poor agreement. However, using the limited number of studies available gives a reference line for Mn compounds with two CO groups *trans* (*i.e.* *trans*-Mn(CO)<sub>2</sub>(CO)<sub>3</sub>(X)) to each other:

$$K(a_1) = 0.8201 \times K(e) + 350.1 \quad (9 \text{ data points, } R^2 = 0.9882)$$

This is significantly different from that used for the Group 6 compounds. Using the same data we can also produce an analogous relationship between the  $K(b_2)$  and  $K(e)$  symmetry force constants.

$$K(b_2) = 1.0178 \times K(e) + 18.5 \quad (7 \text{ data points, } R^2 = 0.9989)$$

Again, this is very different from the equation used for Group 6 complexes, but the amount of data is limited. There are not enough data to produce similar relationships for Re(CO)<sub>5</sub>X nor Tc(CO)<sub>5</sub>(X) complexes.

| Table S7: <i>trans</i> -Mn(CO) <sub>2</sub> ( <u>CO</u> ) <sub>3</sub> (X) molecules to calculate EFFFs for Mn(CO) <sub>5</sub> (X). |         |          |                                                                                                       |
|--------------------------------------------------------------------------------------------------------------------------------------|---------|----------|-------------------------------------------------------------------------------------------------------|
| Molecule                                                                                                                             | $K(a')$ | $K(a'')$ | Ref.                                                                                                  |
| Mn(CO) <sub>5</sub> Cl                                                                                                               | 1796    | 1706     | H. D. Kaesz, R. Bau, D. Hendrickson and J. M. Smith<br><i>J. Am. Chem. Soc.</i> , 89 (1967) 2844-2851 |
| Mn(CO) <sub>5</sub> Br                                                                                                               | 1784    | 1698     |                                                                                                       |

|                                                |      |      |                                                                                                              |
|------------------------------------------------|------|------|--------------------------------------------------------------------------------------------------------------|
| Mn(CO) <sub>5</sub> I                          | 1771 | 1687 |                                                                                                              |
| Mn(CO) <sub>5</sub> CH <sub>3</sub>            | 1728 | 1634 |                                                                                                              |
| Mn(CO) <sub>5</sub> H (CH <sub>4</sub> , 20K)  | 1739 | 1643 | S. P. Church, M. Poliakoff, J. A. Timney and J. J. Turner<br><i>Inorg. Chem.</i> , 22 (1983) 3259-3266       |
| Mn(CO) <sub>5</sub> Cl (CH <sub>4</sub> , 12K) | 1803 | 1710 | T. McHugh, A. J. Rest and D. J. Taylor<br><i>J. C. S. Dalton</i> , (1980) 1803-1808                          |
| Mn(CO) <sub>5</sub> (CO, 20K)                  | 1706 | 1596 | S. P. Church, M. Poliakoff, J. A. Timney and J. J. Turner<br><i>J. Am. Chem. Soc.</i> , 103 (1981) 7515-7520 |
| Mn(CO) <sub>5</sub> H                          | 1736 | 1640 | P. S. Braterman, R. W. Harrill and H. D. Kaesz<br><i>J. Am. Chem. Soc.</i> , 89 (1967) 2851-2855             |
| Mn(CO) <sub>5</sub> D                          | 1737 | 1640 |                                                                                                              |

## 5 Force Constant Calculations for Fe(CO)<sub>4</sub>(N<sub>2</sub>)

The characterization of Fe(CO)<sub>4</sub>(N<sub>2</sub>) in a nitrogen matrix is an interesting application of the “silent-CO” method and we include additional information here that supports our conclusion that the molecule has a C<sub>3v</sub> structure with the N<sub>2</sub> ligand occupying an axial position in the trigonal bipyramid.

### The $\nu(NN)$ stretching region

The first hint of the correct structure comes from the value of the N-N stretching vibration. We showed, many years ago<sup>1</sup>, that the NN force constant of M(L)<sub>n</sub>(N<sub>2</sub>) was linearly related to the force constant of the equivalent carbonyl M(L)<sub>n</sub>(CO):

$$k_{NN}[M(L)_n(N_2)] = 1.355k_{CO}[M(L)_n(CO)] - 210$$

So, for Fe(CO)<sub>4</sub>(N<sub>2</sub>), there are two possible  $\nu(NN)$  frequencies because the equivalent carbonyl (Fe(CO)<sub>5</sub>) has two chemically different CO groups. Recently, Portius, Turner<sup>2</sup> and colleagues have calculated the force constants for Fe(CO)<sub>5</sub> and this enables us to predict  $k(NN)$  and thus  $\nu(NN)$  for both likely isomers of Fe(CO)<sub>4</sub>(N<sub>2</sub>):

|                                                      |                       |
|------------------------------------------------------|-----------------------|
| Observed $\nu(NN)$ (average)                         | 2246 cm <sup>-1</sup> |
| Predicted $\nu(NN)$ , structure A (C <sub>3v</sub> ) | 2251 cm <sup>-1</sup> |
| Predicted $\nu(NN)$ , structure B (C <sub>2v</sub> ) | 2219 cm <sup>-1</sup> |

Clearly, the predicted frequency (obsd - calc = -5 cm<sup>-1</sup>) for A is much closer to the observed frequency than that predicted (obsd - calc = +27 cm<sup>-1</sup>) for B. This gives the first strong indication that A is the correct structure.

We would note that the  $\nu(NN)$  stretch of  $\text{Fe}(\text{CO})_4(\text{N}_2)$  (either isomer; A or B) will be of symmetry  $a_1$  so we would expect some mixing with the  $\nu(\text{CO})$  stretches of the same symmetry. The magnitude of the interaction constant  $k_{\text{CO},\text{NN}}$  is probably comparable to  $k_{\text{CO},\text{CO}}$  but this, in fact, makes very little difference to the  $\nu(\text{CO})$  and  $\nu(\text{NN})$  frequencies; they are effectively decoupled.

### Reference Lines for $\text{Fe}(\text{CO})_4(\text{L})$

The reference line for  $\text{Fe}(\text{CO})_4(\text{L})$  is actually for  $\text{Fe}(\text{CO})_2(\underline{\text{CO}})_2(\text{L})$  where the two vibrating CO groups are in the equatorial plane. This means that we use the same reference line for  $C_{3v}$   $\text{Fe}(\text{CO})_4(\text{L})$  and  $C_{2v}$   $\text{Fe}(\text{CO})_4(\text{L})$ .

$$K(\underline{a}_1) = 0.8076 \times K(b_2) + 387.3$$

For  $C_{3v}$   $\text{Fe}(\text{CO})_4(\text{L})$  (where  $K(e) = K(b_2)$ )

$$k_1 = \frac{1}{2}[K(\underline{a}_1) + K(e)]$$

$$k_{11} = \frac{1}{2}[K(\underline{a}_1) - K(e)]$$

$$k_2 = K(a_1)_1 + K(a_1)_2 + 2K(e) - 3k_1$$

$$k_{12} = \sqrt{\frac{[k_1 + 2k_{11} - K(a_1)_1][k_2 - K(a_1)_1]}{3}}$$

This gives, for  $C_{3v}$   $\text{Fe}(\text{CO})_4(\text{N}_2)$ :

$$k_1 = 1630 \quad k_2 = 1684 \quad k_{11} = 41 \quad k_{12} = 35$$

For  $C_{2v}$   $\text{Fe}(\text{CO})_4(\text{L})$

There are two modes we can apply the silent CO method to:  $b_2$  (as with the  $C_{3v}$  isomer above) or, with less confidence, the  $b_1$  (taking the reference line used for the octahedral  $\text{M}(\text{CO})_4(\text{L})_2$  species) from two CO groups at  $180^\circ$ )

Using the  $b_2$  mode:

This uses the same reference line as the  $C_{3v}$  isomer:

$$K(\underline{a}_1) = 0.8076 \times K(b_2) + 387.3$$

Thus:

$$k_1 = \frac{1}{2}[K(\underline{a}_1) + K(b_2)]$$

$$k_{11} = \frac{1}{2}[K(\underline{a}_1) - K(b_2)]$$



$$k_2 = \frac{1}{2} (K(a_1)_1 + K(a_1)_2 + K(b_1) + K(b_2) - 2k_1)$$

$$k_{12} = \sqrt{\frac{[k_1 + k_{11} - K(a_1)_1][k_2 + k_{22} - K(a_1)_1]}{4}}$$

Depending on the way the bands are assigned, this gives two solutions (see main text).

The  $C_{2v}$   $Fe(CO)_4(L)$  case has an alternative approach using a different reference line (i.e. that used in the octahedral  $M(CO)_4(L)_2$  complexes) that applies to the  $b_1$  mode rather than the  $b_2$ :

$$K(\underline{a}_1) = 0.6771 \times K(b_1) + 621$$

$$k_2 = \frac{1}{2} [K(\underline{a}_1) + K(b_1)]$$

$$k_{22} = \frac{1}{2} [K(\underline{a}_1) - K(b_1)]$$

$$k_1 = \frac{1}{2} (K(a_1)_1 + K(a_1)_2 + K(b_1) + K(b_2) - 2k_2)$$

$$k_{12} = \sqrt{\frac{[k_1 + k_{11} - K(a_1)_1][k_2 + k_{22} - K(a_1)_1]}{4}}$$

If structure B was correct, we would expect at least one of the solutions from the different assignments to be close. [See table below] For all the  $C_{2v}$   $Fe(CO)_4(L)$  species (apart from " $C_{2v}$   $Fe(CO)_4(N_2)$ ") examined thus far (in the main text  $Fe(CO)_4(C_2H_4)$  was added as an example) there is very close agreement between the two methods.

Comparison of calculated force constants ( $Nm^{-1}$ ) for  $C_{2v}$   $Fe(CO)_4(N_2)$  (**B**) using the  $b_1$  mode and the  $b_2$  mode and the reference lines as above.

| Assig. | Mode  | $a_1$  | $a_1$  | $b_1$  | $b_2$  | $k_1$ | $k_2$ | $k_{11}$ | $k_{22}$ | $k_{12}$ |
|--------|-------|--------|--------|--------|--------|-------|-------|----------|----------|----------|
| 1      | $b_2$ | 2083.3 | 1981.6 | 2006.8 | 1971.7 | 1613  | 1655  | 43       | 29       | 41       |
|        | $b_1$ | 2083.3 | 1981.6 | 2006.8 | 1971.7 | 1593  | 1674  | 24       | 48       | 33       |
| 2      | $b_2$ | 2083.3 | 1981.6 | 1971.7 | 2006.8 | 1664  | 1604  | 37       | 34       | 39       |
|        | $b_1$ | 2083.3 | 1981.6 | 1971.7 | 2006.8 | 1641  | 1626  | 15       | 57       | 41       |

As a check of the method, we used the known  $C_{2v}$  structure of  $Fe(CO)_4(C_2H_4)$ , which has an equatorial  $C_2H_4$ , as this gives a comparable molecule to show how the "silent CO" method *should* work. This molecule has  $\nu(CO)$  frequencies at 2087, 2013 (sh),

2007, 1984  $\text{cm}^{-1}$  with the 2007  $\text{cm}^{-1}$  band being the most intense<sup>3</sup>. The force constants can be calculated by using the  $b_1$  mode or the  $b_2$  mode as a starting point. The results are given in Table S8:

Table S8:  
Calculated EFFF force constants (in  $\text{Nm}^{-1}$ ) for  $\text{Fe}(\text{CO})_4(\text{C}_2\text{H}_4)$

|                  | $k_1$ | $k_2$ | $k_{11}$ | $k_{22}$ | $k_{12}$ |
|------------------|-------|-------|----------|----------|----------|
| Using $b_1$ mode | 1631  | 1676  | 41       | 49       | 28       |
| Using $b_2$ mode | 1632  | 1674  | 42       | 48       | 28       |

The agreement between the two calculations is extremely good; unlike for  $C_{2v}$   $\text{Fe}(\text{CO})_4(\text{N}_2)$

- 
- 1 J. A. Timney, *The Identification of Metal Carbonyl Fragments*, PhD Thesis, Newcastle University (1979)
  - 2 P. Portius, M. Buhl, M. W. George, F-W. Grevels and J. J. Turner, *Organometallics* 2019, **38**, 4288
  - 3 B. H. Weiller, M. E. Miller and Edward R. Grant, *J. Am. Chem. Soc.*, 1987, **109**, 352
